# Supplementary material for: Persistent El Niño driven shifts in marine cyanobacteria populations
Source: PubMed Central journal article supplement (PMC7494125; doi:10.1371/journal.pone.0238405), 2020-09-16

Relative Abundance

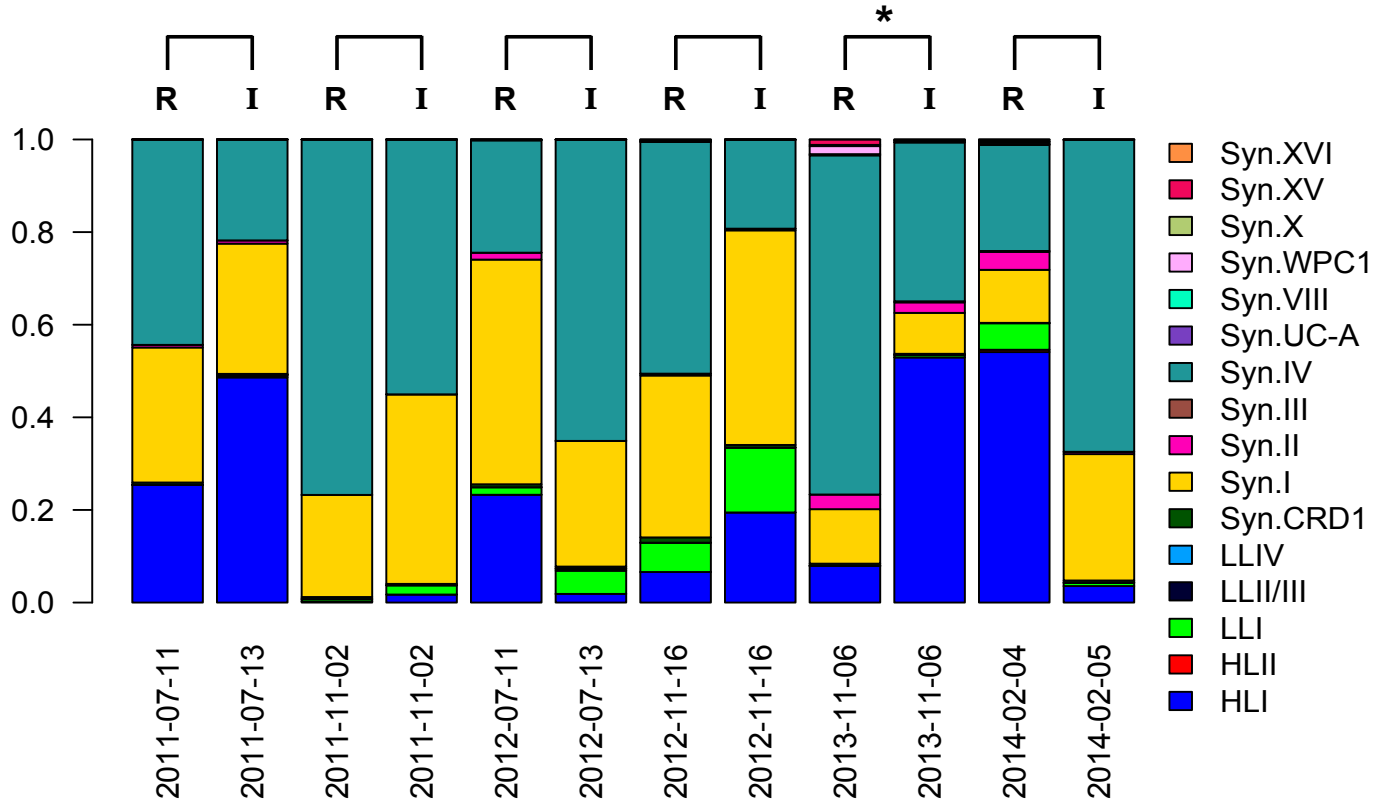

Supplement: pone.0238405.s004.pdf [file pone.0238405.s004.pdf]
